# Supplementary material for: Etiological Work-Up for Adults with Bronchiectasis: A Predictive Diagnostic Score for Primary Ciliary Dyskinesia and Cystic Fibrosis
Source: MDPI journal article supplement (doi:10.3390/jcm10163478), 2021-08-06
Supplement: s1 [file s1]

## Supplementary Materials

**Table S1.** Clinical characteristics of the initial cohort (n=188).

| Characteristic                              | Value           |
|---------------------------------------------|-----------------|
| Mean age $\pm$ SD (y)                       | 55.7 $\pm$ 17.6 |
| F/M sex ratio                               | 130/58          |
| Smoking N (%)                               | 75 (39.9%)      |
| Origin                                      |                 |
| Europe                                      | 124 (66%)       |
| Africa                                      | 12 (6.4%)       |
| Sub-Saharan Africa                          | 40 (21.3%)      |
| Asia                                        | 9 (4.8%)        |
| Caribbean/South America                     | 3 (1.6%)        |
| Mean age at onset of symptoms (y)           | 32.1 $\pm$ 6.1  |
| Mean age at diagnosis of bronchiectasis (y) | 44.5 $\pm$ 22.5 |
| Fertility                                   |                 |
| Female (children)                           | 103 (55%)       |
| Male (children)                             | 44 (23%)        |
| History                                     |                 |
| Measles                                     | 9 (4.8%)        |
| Pertussis                                   | 28 (14.9%)      |
| Tuberculosis                                | 30 (16%)        |
| Severe pneumonia                            | 43 (22.9%)      |
| History of chronic ENT symptoms             | 103 (54.8%)     |
| Family history of respiratory disease       | 85 (45.2%)      |

ENT: ear nose and throat; SD: standard deviation.

**Table S2** Diagnosis characteristics of the 10 CF patients in the score construction group

| Sex | Age at                  |                          | CF Diagnosis | CFTR Mutation(s)        | Sweat | NPD |
|-----|-------------------------|--------------------------|--------------|-------------------------|-------|-----|
|     | 1 <sup>st</sup> symptom | Bronchiectasis Diagnosis |              |                         |       |     |
| F   | 3                       | 23                       | 23           | F508del                 | 55    | +   |
| F   | 10                      | 52                       | 75           | F508del                 | 65    |     |
| M   | 50                      | 60                       | 72           | F508del/D1152H          | 88    |     |
| F   | 6                       | 18                       | 44           | F508del/D1152H          | 44    | +   |
| F   | 1                       | 29                       | 32           | F508del/R117C           | 99    |     |
| F   | 6                       | 27                       | 36           | S549N/D1155A            | 75    |     |
| F   | 27                      | 28                       | 34           | S549N/D1155A            | 67    |     |
| F   | 12                      | 73                       | 73           | F508del/R117H           | 65    |     |
| F   | 13                      | 20                       | 69           | R668C/G567/D443Y        | 67    |     |
| M   | 30                      | 30                       | 54           | S466X; R1070Q/2789+GG>A | 99    |     |

NPD: nasal potential difference; CF: cystic fibrosis; F: female; M: male.

**Table S3** Performance of PICADAR score, Leigh score and our score in the validation cohort

| <i>n</i> =136  | PICADAR |     | Leigh |     | Current Score |    |
|----------------|---------|-----|-------|-----|---------------|----|
|                | ≤ 5     | > 5 | < 2   | ≥ 2 | ≤ 8           | >8 |
| Non CF non PCD | 122     | 0   | 120   | 2   | 67            | 55 |
| CF             | 5       | 0   | 5     | 0   | 1             | 4  |
| PCD            | 6       | 3   | 7     | 2   | 0             | 9  |

CF: cystic fibrosis; PCD: primary ciliary dyskinesia
